# Supplementary material for: Jellyfish mucus-derived organic matter as a source of labile nutrients for the ambient microbial community
Source: PeerJ. 2026 Feb 12;14:e20784. doi: 10.7717/peerj.20784 (PMC12906709; doi:10.7717/peerj.20784)
Supplement: Supplemental Information 8 — Concentration of dissolved and particulate nutrients (NH\documentclass[12pt]{minimal} \usepackage{amsmath} \usepackage{wasysym} \usepackage{amsfonts} \usepackage{amssymb} \usepackage{amsbsy} \usepackage{upgreek} \usepackage{mathrsfs} \setlength{\oddsidemargin}{-69pt} \begin{document} ${}_{4}^{+}$\end{document}4+, NO\documentclass[12pt]{minimal} \usepackage{amsmath} \usepackage{wasysym} \usepackage{amsfonts} \usepackage{amssymb} \usepackage{amsbsy} \usepackage{upgreek} \usepackage{mathrsfs} \setlength{\oddsidemargin}{-69pt} \begin{document} ${}_{3}^{-}$\end{document}3−, NO\documentclass[12pt]{minimal} \usepackage{amsmath} \usepackage{wasysym} \usepackage{amsfonts} \usepackage{amssymb} \usepackage{amsbsy} \usepackage{upgreek} \usepackage{mathrsfs} \setlength{\oddsidemargin}{-69pt} \begin{document} ${}_{2}^{-}$\end{document}2−, PO\documentclass[12pt]{minimal} \usepackage{amsmath} \usepackage{wasysym} \usepackage{amsfonts} \usepackage{amssymb} \usepackage{amsbsy} \usepackage{upgreek} \usepackage{mathrsfs} \setlength{\oddsidemargin}{-69pt} \begin{document} ${}_{4}^{+}$\end{document}4+, TDN, DOC, POC, PON and DFAA) in the ASW and the ASW:FSW (ratio 9:1). [file peerj-14-20784-s008.docx]

|  | ASW | ASW:FSW |
| --- | --- | --- |
|  | (µmol L-1) | (µmol L-1) |
| NH4+ | 3.4 ± 0.2 | 3.0 ± 0.2 |
| NO3- | 1.3 ± 0.0 | 1.0 ± 0.3 |
| NO2- | 0.1 ± 0.0 | 0.1 ± 0.0 |
| PO43- | 0.1 ± 0.0 | 0.1 ± 0.0 |
| TDN | 12.6 ± 0.1 | 10.2 ± 1.1 |
| DOC | 132.0 ± 3.3 | 125.2 ± 15.1 |
| POC | 9.9 ± 0.0 | 11.3 ± 5.5 |
| PON | 14.2 ± 0.0 | 19.6 ± 10.2 |
| DFAA | 0.1 ± 0.0 | 0.1 ± 0.0 |
