# Supplementary material for: Jellyfish mucus-derived organic matter as a source of labile nutrients for the ambient microbial community
Source: PeerJ. 2026 Feb 12;14:e20784. doi: 10.7717/peerj.20784 (PMC12906709; doi:10.7717/peerj.20784)
Supplement: Supplemental Information 11 — Cumulative amount of dissolved nutrients (NH\documentclass[12pt]{minimal} \usepackage{amsmath} \usepackage{wasysym} \usepackage{amsfonts} \usepackage{amssymb} \usepackage{amsbsy} \usepackage{upgreek} \usepackage{mathrsfs} \setlength{\oddsidemargin}{-69pt} \begin{document} ${}_{4}^{+}$\end{document}4+, NO\documentclass[12pt]{minimal} \usepackage{amsmath} \usepackage{wasysym} \usepackage{amsfonts} \usepackage{amssymb} \usepackage{amsbsy} \usepackage{upgreek} \usepackage{mathrsfs} \setlength{\oddsidemargin}{-69pt} \begin{document} ${}_{3}^{-}$\end{document}3−, NO\documentclass[12pt]{minimal} \usepackage{amsmath} \usepackage{wasysym} \usepackage{amsfonts} \usepackage{amssymb} \usepackage{amsbsy} \usepackage{upgreek} \usepackage{mathrsfs} \setlength{\oddsidemargin}{-69pt} \begin{document} ${}_{2}^{-}$\end{document}2−, PO\documentclass[12pt]{minimal} \usepackage{amsmath} \usepackage{wasysym} \usepackage{amsfonts} \usepackage{amssymb} \usepackage{amsbsy} \usepackage{upgreek} \usepackage{mathrsfs} \setlength{\oddsidemargin}{-69pt} \begin{document} ${}_{4}^{+}$\end{document}4+, DIN, TDN, DON, DOC, DFAA) that leached through a 1 kDa MWCO membrane tubing within 24 h expressed in µmol per g of dry weight (DW). The fraction <1 kDa represents low molecular weight compounds (LMW). [file peerj-14-20784-s011.docx]

|  | LMW  (µmol gDW-1 d-1) |
| --- | --- |
| NH4+ | 2.0 ± 0.3 |
| NO3- | 0.8 ± 0.3 |
| NO2- | <LOD |
| PO43- | 1.5 ± 0.3 |
| DIN | 2.8 ± 0.6 |
| TDN | 21.6 ± 3.7 |
| DON | 18.8 ± 3.1 |
| DOC | 57.5 ± 38.5 |
| DFAA | 9.7 ± 0.6 |
