# Supplementary material for: Jellyfish mucus-derived organic matter as a source of labile nutrients for the ambient microbial community
Source: PeerJ. 2026 Feb 12;14:e20784. doi: 10.7717/peerj.20784 (PMC12906709; doi:10.7717/peerj.20784)
Supplement: Supplemental Information 14 — p -values from Wilcoxon rank-sum tests comparing concentrations of dissolved inorganic nutrients (NH\documentclass[12pt]{minimal} \usepackage{amsmath} \usepackage{wasysym} \usepackage{amsfonts} \usepackage{amssymb} \usepackage{amsbsy} \usepackage{upgreek} \usepackage{mathrsfs} \setlength{\oddsidemargin}{-69pt} \begin{document} ${}_{4}^{+}$\end{document}4+, NO\documentclass[12pt]{minimal} \usepackage{amsmath} \usepackage{wasysym} \usepackage{amsfonts} \usepackage{amssymb} \usepackage{amsbsy} \usepackage{upgreek} \usepackage{mathrsfs} \setlength{\oddsidemargin}{-69pt} \begin{document} ${}_{3}^{-}$\end{document}3−, NO\documentclass[12pt]{minimal} \usepackage{amsmath} \usepackage{wasysym} \usepackage{amsfonts} \usepackage{amssymb} \usepackage{amsbsy} \usepackage{upgreek} \usepackage{mathrsfs} \setlength{\oddsidemargin}{-69pt} \begin{document} ${}_{2}^{-}$\end{document}2−, PO\documentclass[12pt]{minimal} \usepackage{amsmath} \usepackage{wasysym} \usepackage{amsfonts} \usepackage{amssymb} \usepackage{amsbsy} \usepackage{upgreek} \usepackage{mathrsfs} \setlength{\oddsidemargin}{-69pt} \begin{document} ${}_{4}^{{3}^{-}}$\end{document}43−) and microbial parameters (microbial abundance, PHP, DOC, and TDN) between dry-MAOM and frozen-MAOM treatments at each sampling time. “NA” indicates comparisons where all values were identical. [file peerj-14-20784-s014.docx]

| Time (h) | 0 | 5 | 10 | 20 | 30 | 42 |
| --- | --- | --- | --- | --- | --- | --- |
| NH4+ | 1 | 0.7 | 0.4 | 1 | 1 | 0.4 |
| NO3- | 0.7 | 0.2 | 0.7 | 0.2 | 0.2 | 0.4 |
| NO2- | 0.82 | 0.1 | 0.64 | 0.12 | 0.08 | 0.51 |
| PO43- | 0.4 | 0.27 | 0.51 | 0.1 | *NA* | 1 |
| MA | *NA* | 0.4 | 0.2 | 1 | 0.1 | 1 |
| PHP | *NA* | 0.2 | 0.1 | 0.4 | 0.4 | 0.2 |
| DOC | *NA* | 1 | 0.2 | 0.7 | 1 | 0.2 |
| TDN | *NA* | 0.7 | 0.2 | 0.7 | 1 | 0.2 |
